# Supplementary material for: From landrace to modern hybrid broccoli: the genomic and morphological domestication syndrome within a diverse B. oleracea collection
Source: PubMed Central journal article supplement (PMC7528014; doi:10.1038/s41438-020-00375-0), 2020-10-01

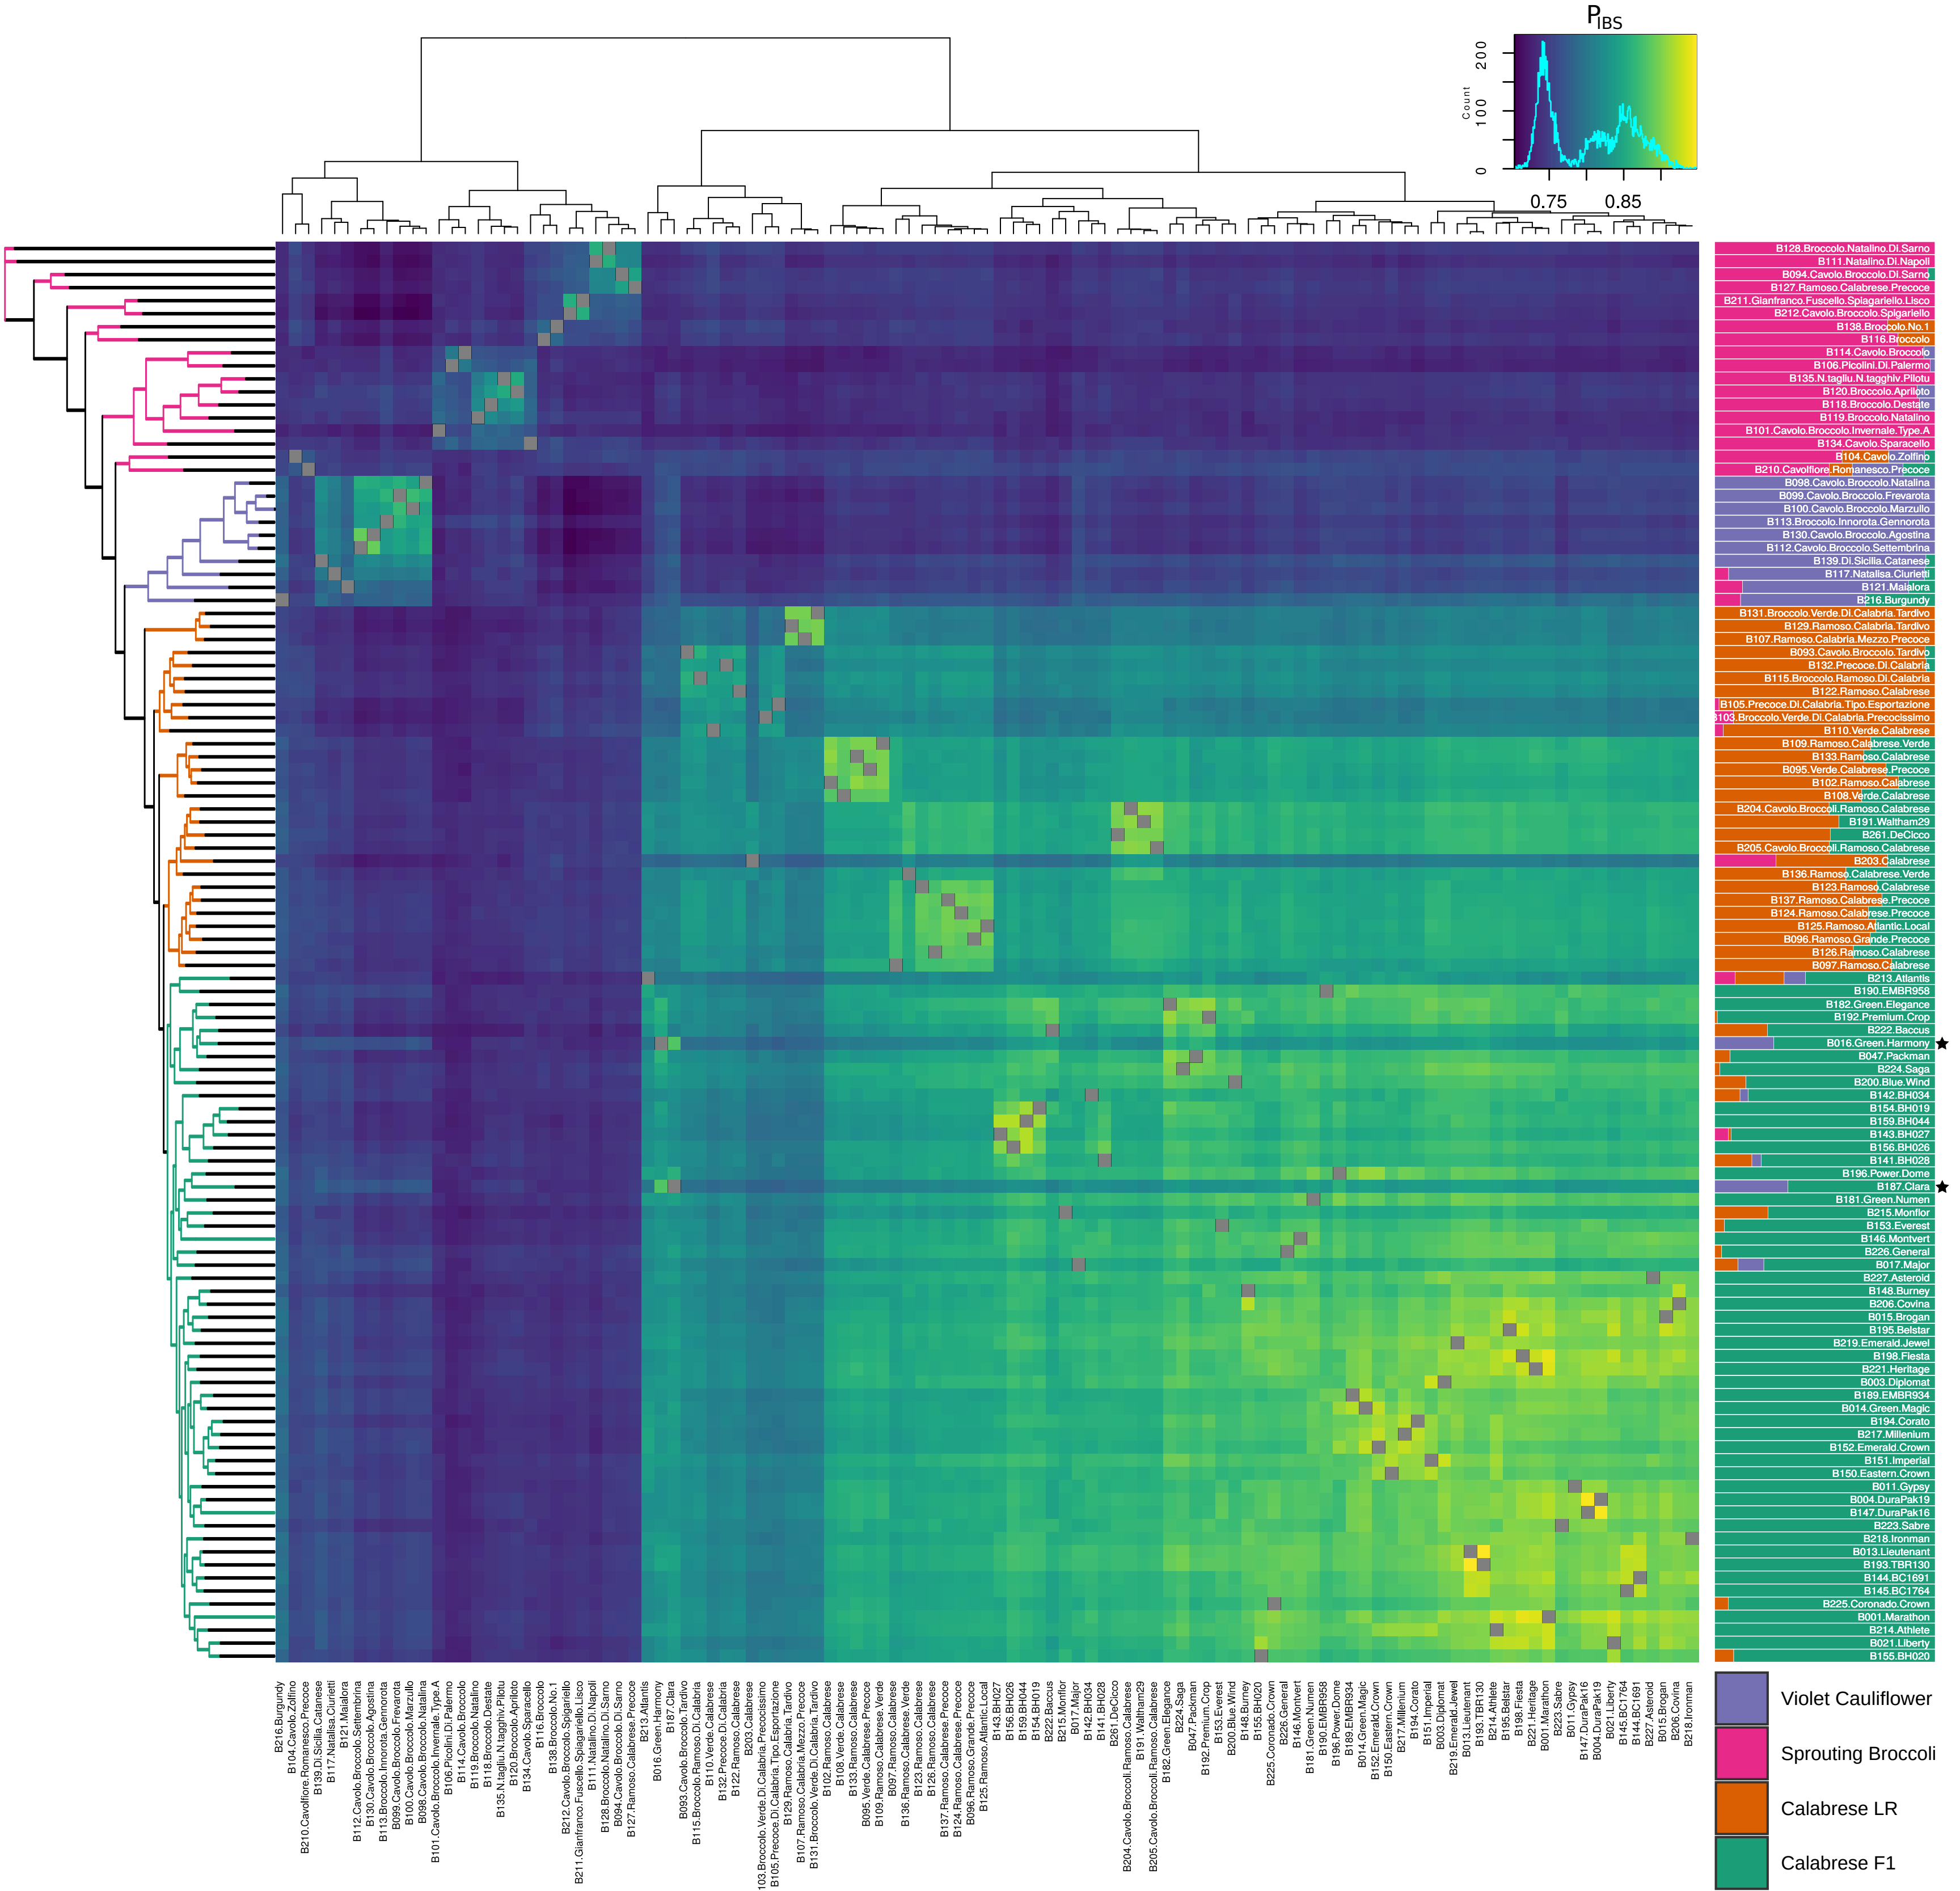

Supplement: 41438_2020_375_MOESM3_ESM.pdf [file 41438_2020_375_MOESM3_ESM.pdf]
